# Supplementary material
Source: PubMed Central journal article supplement (PMC6624841)

Sorted  $\alpha$ -cells (GCG/INS/SST staining)

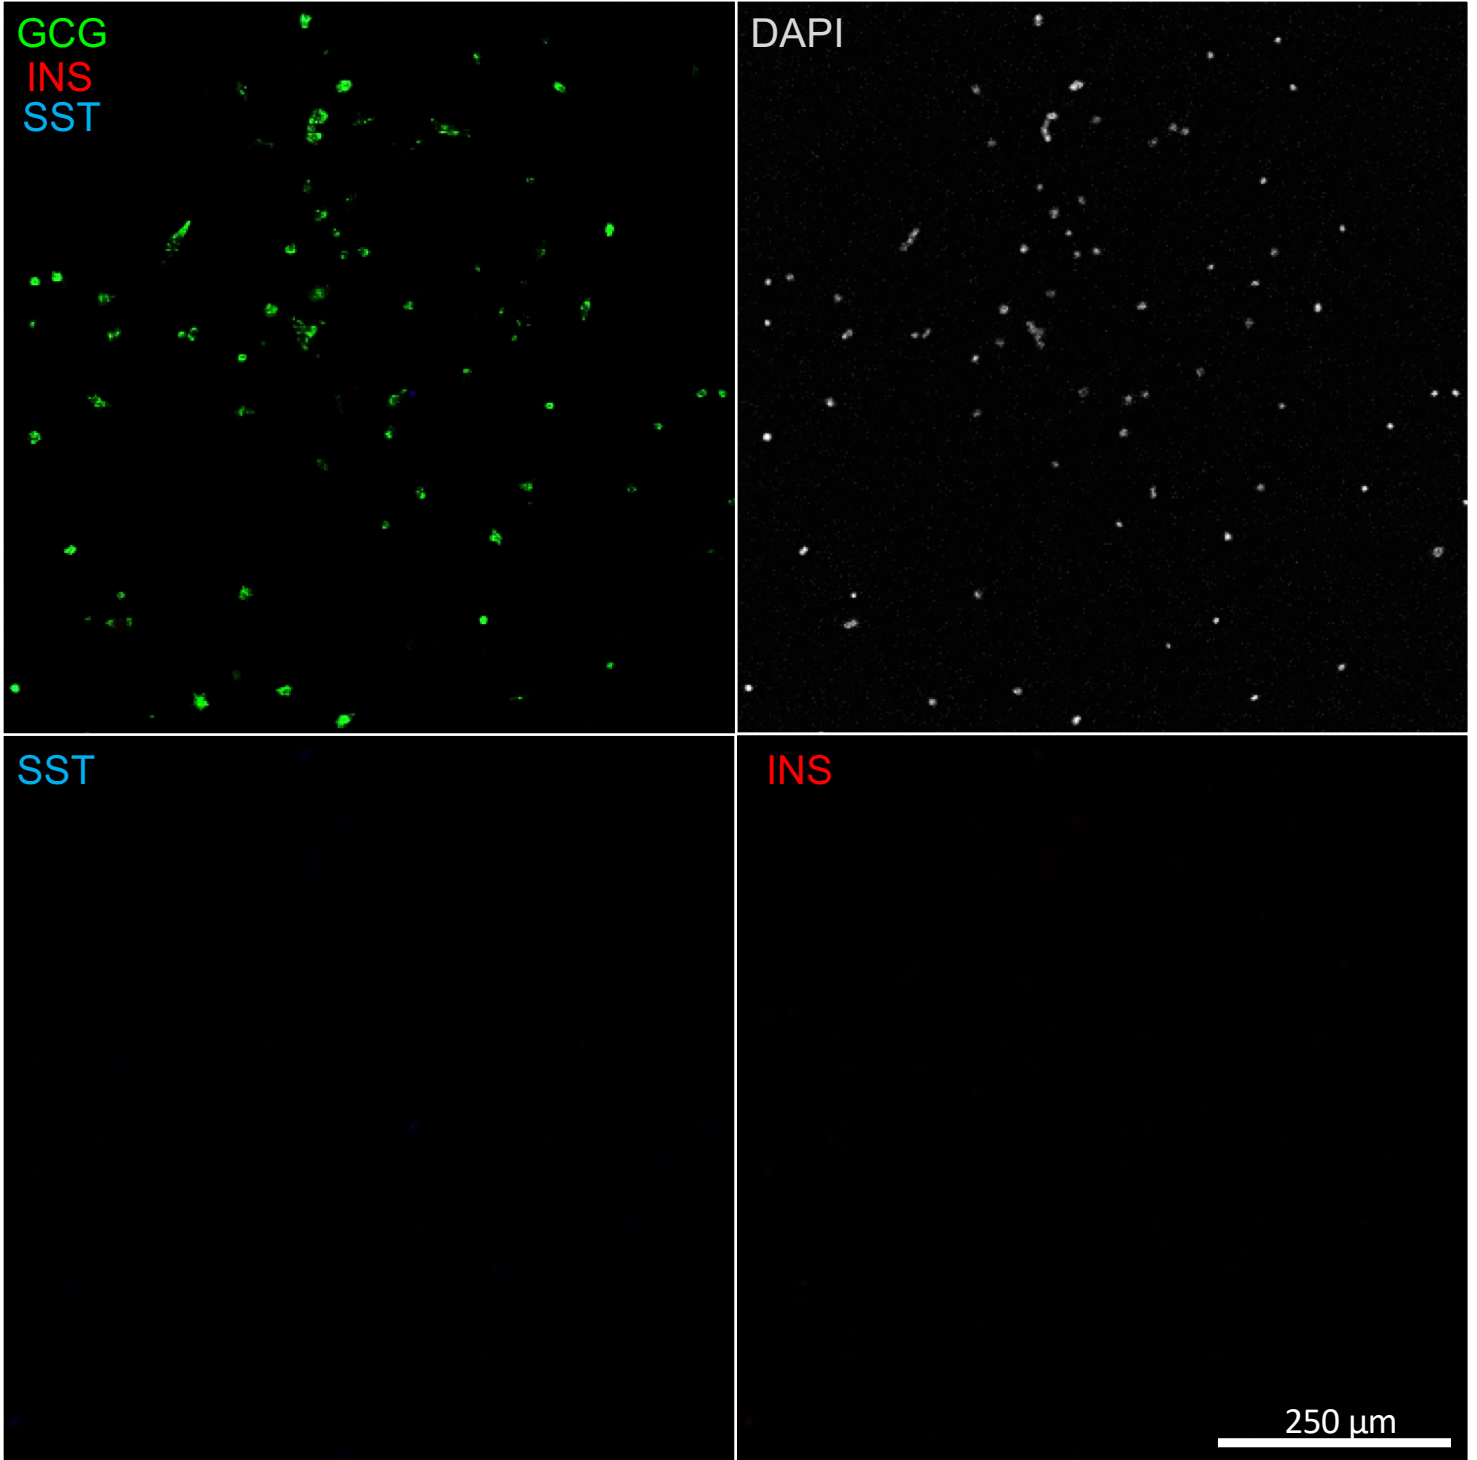

Sorted  $\alpha$ -cells (GCG/PPY/INS staining)

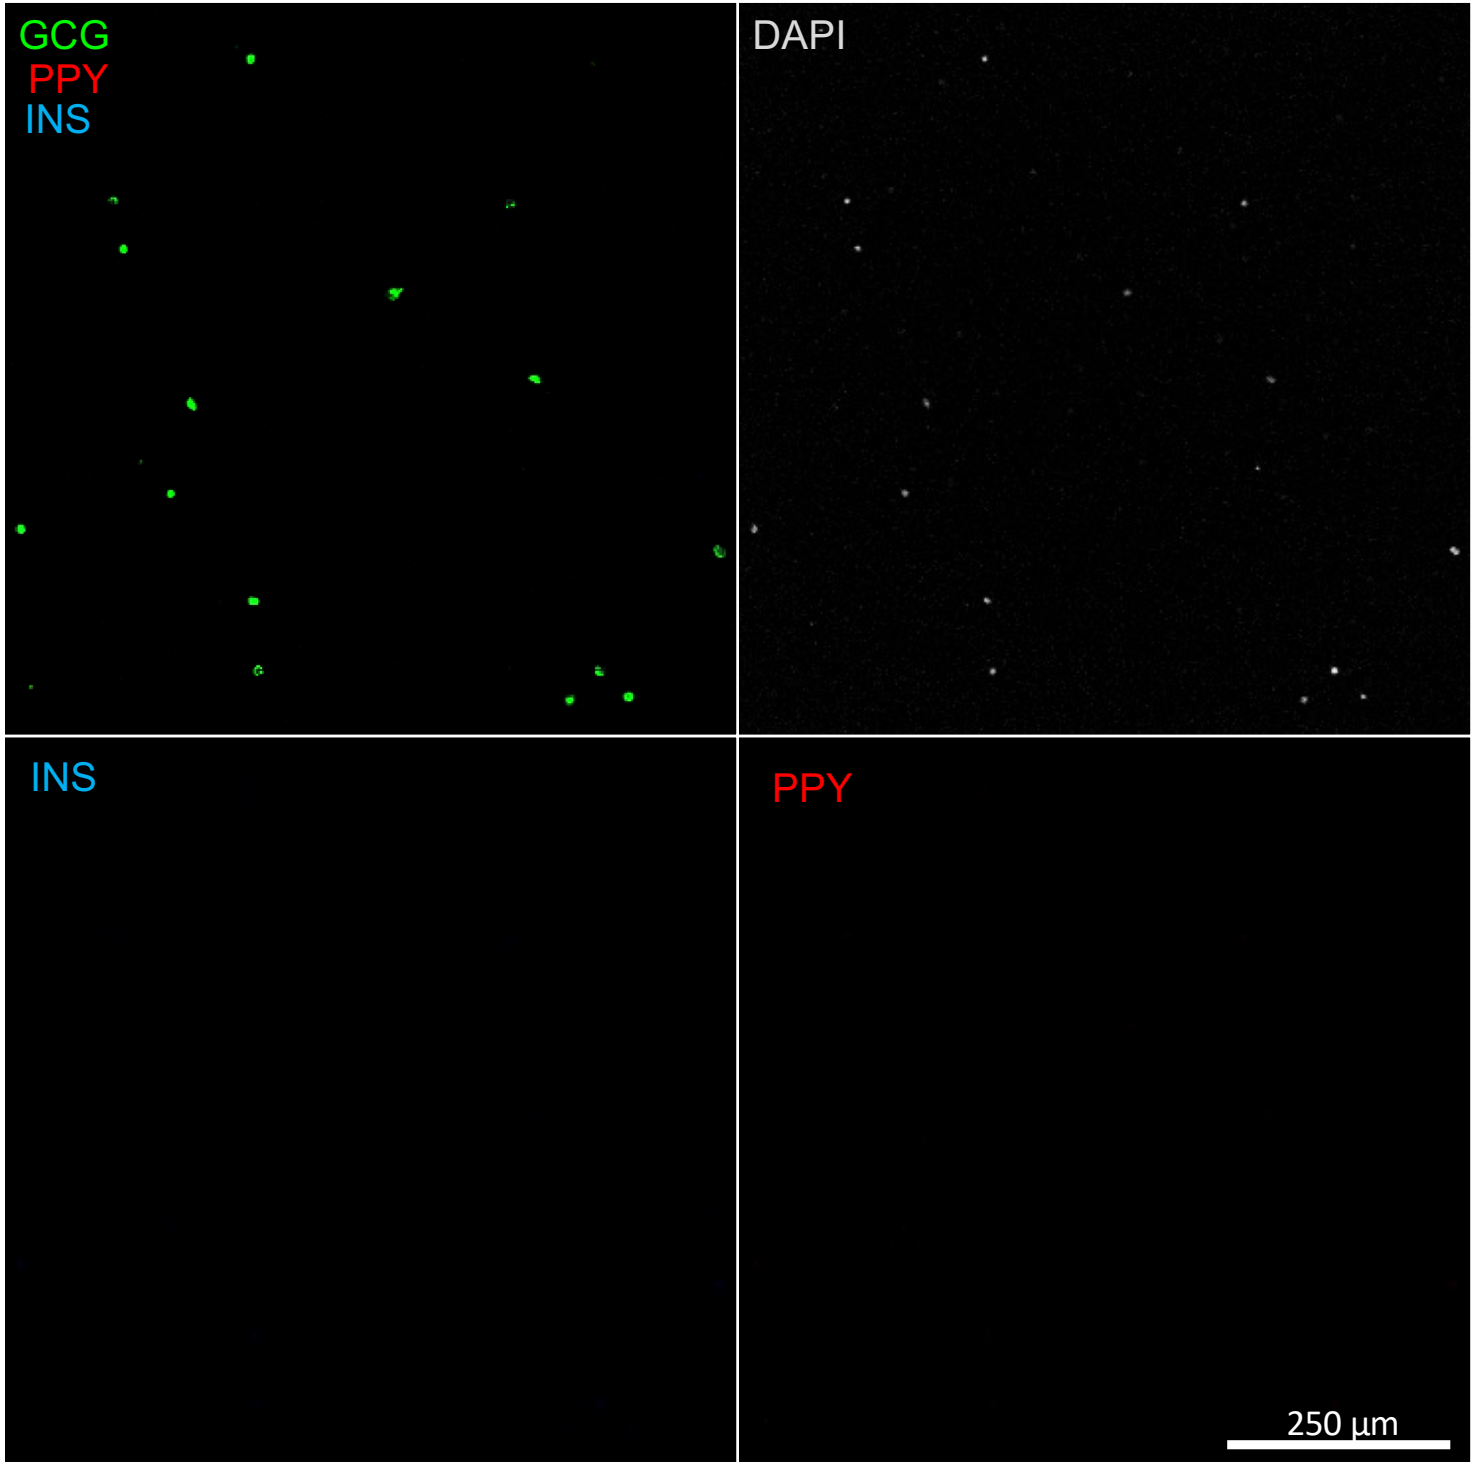

Sorted  $\beta$ -cells (INS/SST/GCG staining)

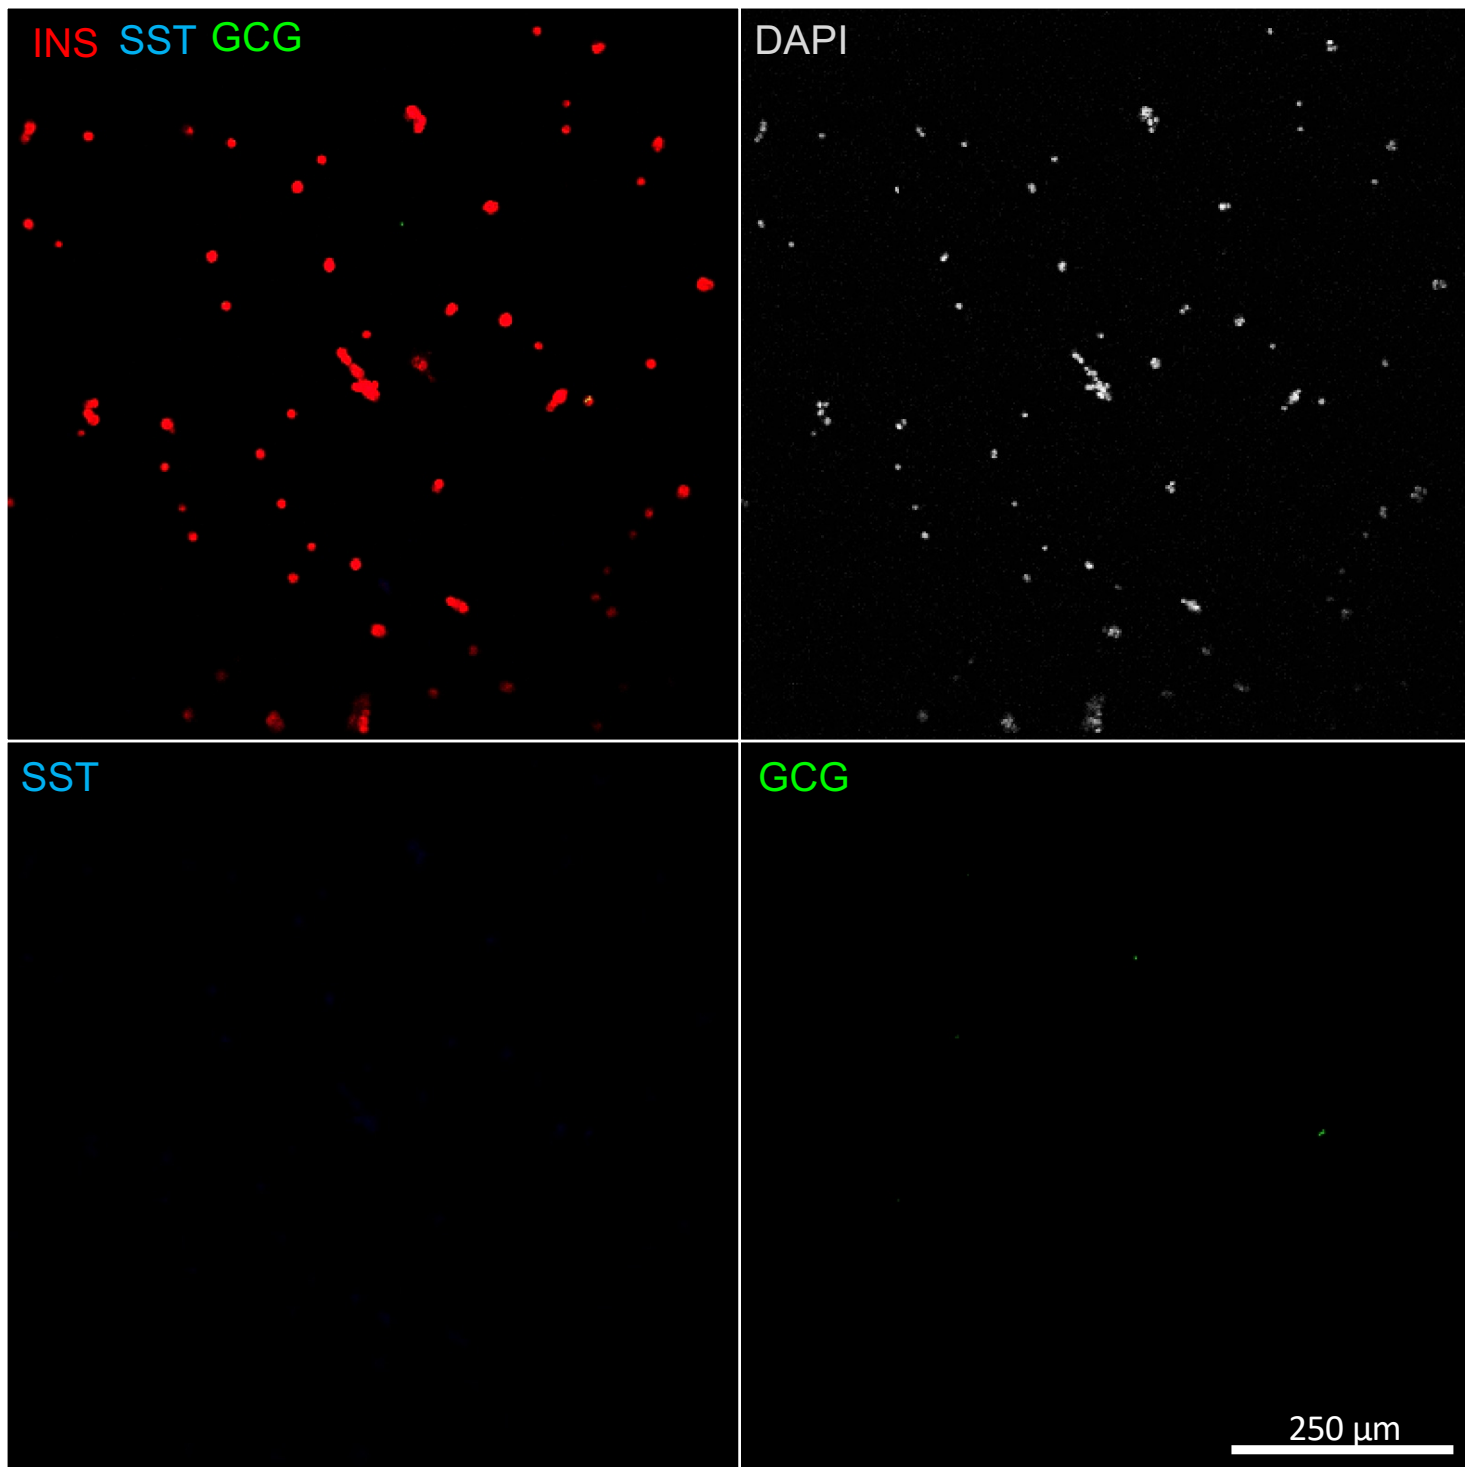

Sorted  $\beta$ -cells (INS/PPY/GCG staining)

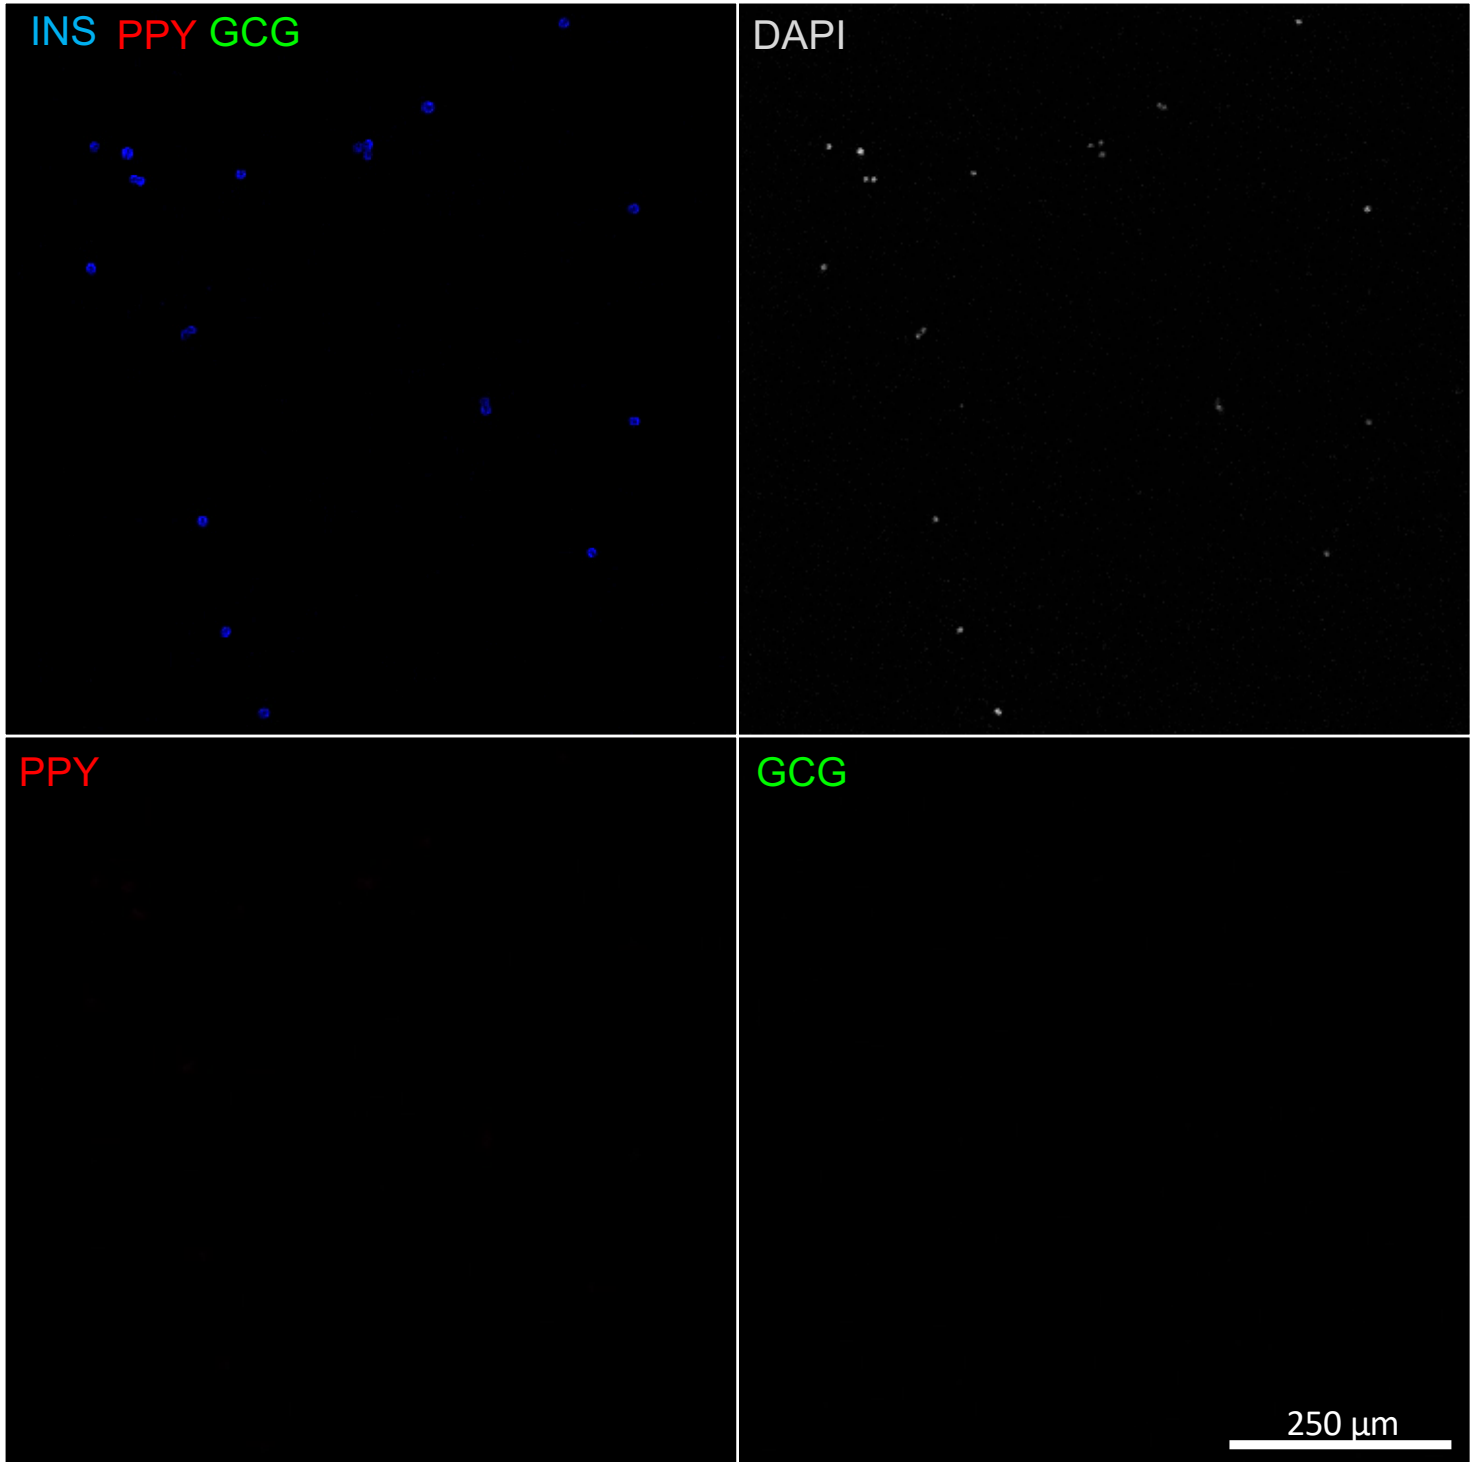

Supplement: NIHMS1518742-supplement-Supplementary_Data_1.pdf [file NIHMS1518742-supplement-Supplementary_Data_1.pdf]
