# Supplementary material
Source: PubMed Central journal article supplement (PMC6624841)
Supplement: NIHMS1518742-supplement-Supplementary_Information_Guide.pdf [file NIHMS1518742-supplement-Supplementary_Information_Guide.pdf]

# Supplementary Information

## Supplementary Tables 1 to 23 (“Supplementary Tables.xlsx”)

- **Supplementary Table 1:** Donor information for human islet preparations
- **Supplementary Table 2:** Cell Sorting results
- **Supplementary Table 3:** Summary of transplantations experiments
- **Supplementary Table 4:** Transplantation of non-diabetic donor samples into healthy mice (Exp. #1)
- **Supplementary Table 5:** Transplantation of non-diabetic donor samples into diabetic mice (Exp. #2: single ND-donor transplantation)
- **Supplementary Table 6:** Transplantation of non-diabetic multiple donor samples into diabetic mice (Exp. #3 & #4: multiple ND-donor transplantation)
- **Supplementary Table 7:** Transplantation of T2D donor samples into diabetic mice (Exp. #5: multiple T2D-donor transplantation)
- **Supplementary Table 8:** RNA-seq samples
- **Supplementary Table 9:** Proteomic samples
- **Supplementary Table 10:**  $\beta$ -cell enriched genes
- **Supplementary Table 11:** Upregulated  $\beta$ -cell-related genes involved in “aggregation effect”
- **Supplementary Table 12:** Upregulated  $\beta$ -cell-related genes involved in “PM effect”
- **Supplementary Table 13:** Upregulated  $\beta$ -cell-related genes involved in both “aggregation and PM effect”
- **Supplementary Table 14:**  $\alpha$ -cell enriched genes (related to Extended Data Fig. 8e)
- **Supplementary Table 15:** Downregulated  $\alpha$ -cell-related genes involved in “aggregation effect” (related to Extended Data Fig. 8f)
- **Supplementary Table 16:** Downregulated  $\alpha$ -cell-related genes involved in “PM effect” (related to Extended Data Fig. 8g)
- **Supplementary Table 17:** Downregulated  $\alpha$ -cell-related genes involved in both “aggregation and PM effects” (related to Extended Data Fig. 8g)
- **Supplementary Table 18:** Upregulated  $\alpha$ -cell-related genes during reprogramming process
- **Supplementary Table 19:**  $\beta$ -cell-related proteins detected in the aggregation and PM-effect signature (related to Fig.4h)
- **Supplementary Table 20:** IPA downstream effects analysis in comparison between before and after transplantation of  $\alpha$ PM cells (related to Extended Data Fig.8i)
- **Supplementary Table 21:** IPA using scRNA-seq data in comparison between “early” and “late”  $\alpha$ PM
- **Supplementary Table 22:** HLA haplotypes of donor samples used in CTL killing assay (related to Fig. 6)
- **Supplementary Table 23:** List of primer sequences for RT-qPCR

## Supplementary Data 1-3

- **Supplementary Data 1:** Immunostaining of sorted islet cells
- **Supplementary Data 2:** Tile scan picture of immunostaining in sorted  $\alpha$ -cells
- **Supplementary Data 3:** Tile scan picture of immunostaining in sorted  $\beta$ -cells
